# Supplementary material for: Preterm birth and structural brain alterations in early adulthood
Source: PubMed Central journal article supplement (PMC4215396; doi:10.1016/j.nicl.2014.08.005), 2014-08-13
Supplement: mmc1.pdf [file mmc1.pdf]

## Supplementary material

Table 1. Correlation between cognitive outcome variables, by group.

|          | WASI Voc       | WASI Sim       | WASI MR        | WASI BD        | HSCT           | COWAT        | WMS Imm        |
|----------|----------------|----------------|----------------|----------------|----------------|--------------|----------------|
| WASI Sim |                | 1.00           |                |                |                |              |                |
| CONTROL  | 0.63 (<0.0001) |                |                |                |                |              |                |
| VPT      | 0.83 (<0.0001) |                |                |                |                |              |                |
| WASI MR  |                |                | 1.00           |                |                |              |                |
| CONTROL  | 0.59 (<0.0001) | 0.47 (0.002)   |                |                |                |              |                |
| VPT      | 0.49 (<0.0001) | 0.48 (<0.0001) |                |                |                |              |                |
| WASI BD  |                |                |                | 1.00           |                |              |                |
| CONTROL  | 0.58 (<0.0001) | 0.50 (0.001)   | 0.54 (<0.0001) |                |                |              |                |
| VPT      | 0.35 (0.005)   | 0.40 (0.001)   | 0.52 (<0.0001) |                |                |              |                |
| HSCT     |                |                |                |                | 1.00           |              |                |
| CONTROL  | 0.30 (0.06)    | 0.24 (0.14)    | 0.12 (0.48)    | 0.30 (0.06)    |                |              |                |
| VPT      | 0.22 (0.08)    | 0.26 (0.04)    | 0.21 (0.09)    | 0.21 (0.10)    |                |              |                |
| COWAT    |                |                |                |                |                | 1.00         |                |
| CONTROL  | 0.64 (<0.0001) | 0.36 (0.02)    | 0.34 (0.04)    | 0.40 (0.01)    | 0.38 (0.015)   |              |                |
| VPT      | 0.44 (<0.0001) | 0.52 (<0.0001) | 0.48 (<0.0001) | 0.24 (0.06)    | 0.42 (<0.0001) |              |                |
| WMS Imm  |                |                |                |                |                |              | 1.00           |
| CONTROL  | 0.34 (0.03)    | 0.34 (0.03)    | 0.44 (0.005)   | 0.31 (0.05)    | -0.02 (0.90)   | 0.14 (0.40)  |                |
| VPT      | 0.38 (0.002)   | 0.53 (<0.0001) | 0.53 (<0.0001) | 0.49 (<0.0001) | 0.13 (0.28)    | 0.36 (0.004) |                |
| WMS Del  |                |                |                |                |                |              |                |
| CONTROL  | 0.26 (0.09)    | 0.21 (0.20)    | 0.39 (0.12)    | 0.32 (0.05)    | 0.13 (0.41)    | 0.26 (0.11)  | 0.83 (<0.0001) |
| VPT      | 0.32 (0.009)   | 0.49 (<0.0001) | 0.56 (<0.0001) | 0.55 (<0.0001) | 0.12 (0.36)    | 0.41 (0.001) | 0.87 (<0.0001) |

WASI = Wechsler Abbreviated Scale of Intelligence; WASI Sim = WASI Similarities; WASI Voc = WASI Vocabulary; WASI MR = WASI Matrix Reasoning; WASI BD = WASI Block Design; HSCT = Hayling Sentence Completion Test; COWAT = Controlled Oral Word Association Test; WMS Imm = Visual Reproduction test of the Wechsler Memory Scale-Revised immediate recall; WMS Del = Visual Reproduction test of the Wechsler Memory Scale-Revised delayed recall

Table 2. Cluster maxima^ structural differences in GM and WM volume between VPT individuals excluding those with periventricular haemorrhage and ventricular dilatation and controls.

|                                            | Talairach    |     |     | SPM[Z] |
|--------------------------------------------|--------------|-----|-----|--------|
|                                            | Coordinates* |     |     |        |
|                                            | X            | Y   | Z   |        |
| <b>GREY MATTER</b>                         |              |     |     |        |
| <b>Control &gt; Preterm</b>                |              |     |     |        |
| Medial temporal gyrus (BA 21)              | 49           | -13 | -9  | >8.00  |
| Medial temporal gyrus (BA 21)              | 42           | -2  | -19 | 5.88   |
| Insula (BA 13)/Postcetrnal Gyrus (BA 43)   | 41           | -9  | 20  | 6.09   |
| Medial temporal gyrus (BA 21)              | -55          | -10 | -8  | 6.36   |
| Medial Temporal Gyrus (BA 19)              | 28           | -72 | 20  | 5.81   |
| Caudate Head Ext. to Putamen               | 13           | 19  | -5  | 5.94   |
| Thalamus                                   | -21          | -28 | 8   | 4.87   |
| Medial Occipital Gyrus (BA 18)             | -20          | -79 | 19  | 4.60   |
| Heschl Gyrus (BA 41)                       | -47          | -11 | 14  | 4.68   |
| <b>GREY MATTER</b>                         |              |     |     |        |
| <b>Control &lt; Preterm</b>                |              |     |     |        |
| Medial Frontal/Cingulate Gyrus (BA 10, 24) | -4           | 45  | 3   | 4.67   |
| <b>WHITE MATTER</b>                        |              |     |     |        |
| <b>Control &gt; Preterm</b>                |              |     |     |        |
| Superior Temporal Gyrus                    | 42           | -3  | -8  | 7.56   |
| Medial Temporal Gyrus                      | -47          | -5  | -11 | 6.18   |
| Posterior corpus callosum                  |              |     |     | 6.46   |
| Ext. to Thalamus                           | -3           | -31 | 7   | 6.46   |
| <b>WHITE MATTER</b>                        |              |     |     |        |
| <b>Control &lt; Preterm</b>                |              |     |     |        |
| Lingual gyrus                              | 19           | -51 | 3   | 5.28   |
| Parahippocampal gyrus                      | 10           | -46 | -3  | 5.11   |
| Anterior Cerebellum                        | 18           | -47 | -10 | 5.04   |
| Fusiform Gyrus                             | 45           | -42 | -15 | 4.82   |
| Lingual Gyrus                              | -21          | -49 | -3  | 4.76   |
| Anterior Cerebellum                        | -9           | -40 | -4  | 4.65   |
| Parahippocampal gyrus                      | -27          | -49 | 3   | 4.60   |
| Medial Frontal Gyrus                       | 31           | 50  | 13  | 4.69   |

^ Voxel level local maxima more than 8.0 mm apart with a p value corrected for family-wise error (FWE) of <0.05, and a conservative threshold on cluster size, comprising 50 or more contiguous significant voxels are reported.

Talairach coordinates (x, y, z), where x = left(-) vs. right(+); y = anterior(+) vs. posterior(-) and z = ventral(+) vs. dorsal(-). 0 is regarded as being at the level of the anterior commissure.

Table 3. Cluster maxima^ structural differences in GM and WM volume between 'cognitively unimpaired' VPT individuals and 'cognitively unimpaired' controls.

|                                              |                                                                                              | Talairach Coordinates* |     |     | SPM[Z] |
|----------------------------------------------|----------------------------------------------------------------------------------------------|------------------------|-----|-----|--------|
|                                              |                                                                                              | X                      | Y   | Z   |        |
| <b>GREY MATTER<br/>Control &gt; Preterm</b>  |                                                                                              |                        |     |     |        |
|                                              | Medial Temporal Gyrus (BA 21)                                                                | 51                     | -10 | -9  | >8.00  |
|                                              | Medial Temporal Gyrus (BA 21)                                                                | -54                    | -10 | -8  | 6.49   |
|                                              | Medial Temporal Gyrus (BA 19)                                                                | 29                     | -72 | 20  | 5.83   |
|                                              | Caudate Head Ext. to Putamen                                                                 | 14                     | 19  | -5  | 5.47   |
|                                              | Thalamus (Pulvinar)                                                                          | -18                    | -30 | 9   | 5.02   |
|                                              | Heschl Gyrus (BA 41)                                                                         | -46                    | -9  | 14  | 4.77   |
|                                              | Cingulate Gyrus (BA 24)                                                                      | -16                    | 19  | -5  | 4.52   |
|                                              | Middle Frontal Gyrus (BA 46)                                                                 | 36                     | 14  | 18  | 4.48   |
|                                              | Medial Frontal Gyrus (BA 25)                                                                 | -10                    | 26  | -12 | 4.41   |
|                                              | Medial Occipital Gyrus (BA 18)                                                               | -18                    | -77 | 18  | 4.36   |
| <b>GREY MATTER<br/>Control &lt; Preterm</b>  |                                                                                              |                        |     |     |        |
|                                              | n/s                                                                                          |                        |     |     |        |
| <b>WHITE MATTER<br/>Control &gt; Preterm</b> |                                                                                              |                        |     |     |        |
|                                              | Medial temporal gyrus                                                                        | 51                     | -2  | -21 | 7.71   |
|                                              | Inferior / Medial Temporal Gyrus                                                             | -53                    | -6  | -21 | 6.20   |
|                                              | Posterior corpus callosum<br>Ext. to Thalamus (Pulvinar)<br>and including hippocampal fornix | -1                     | -31 | 5   | 5.80   |
| <b>WHITE MATTER<br/>Control &lt; Preterm</b> |                                                                                              |                        |     |     |        |
|                                              | Lingual Gyrus                                                                                | 19                     | -51 | 3   | 4.64   |
|                                              | Fusiform Gyrus                                                                               | 45                     | -42 | -14 | 4.35   |
|                                              | Posterior cerebellum                                                                         | 2                      | -60 | -33 | 4.33   |

^ Voxel level local maxima more than 8.0 mm apart with a p value corrected for family-wise error (FWE) of <0.05, and a conservative threshold on cluster size, comprising 50 or more contiguous significant voxels are reported.

\* Talairach coordinates (x, y, z), where x = left(-) vs. right(+); y = anterior(+) vs. posterior(-) and z = ventral(+) vs. dorsal(-). 0 is regarded as being at the level of the anterior commissure.
